# Supplementary material
Source: PubMed Central journal article supplement (PMC3816757)
Supplement: NIHMS523000-supplement-01.pdf [file NIHMS523000-supplement-01.pdf]

Klos-Dehring et al. Supplemental Figure 1.

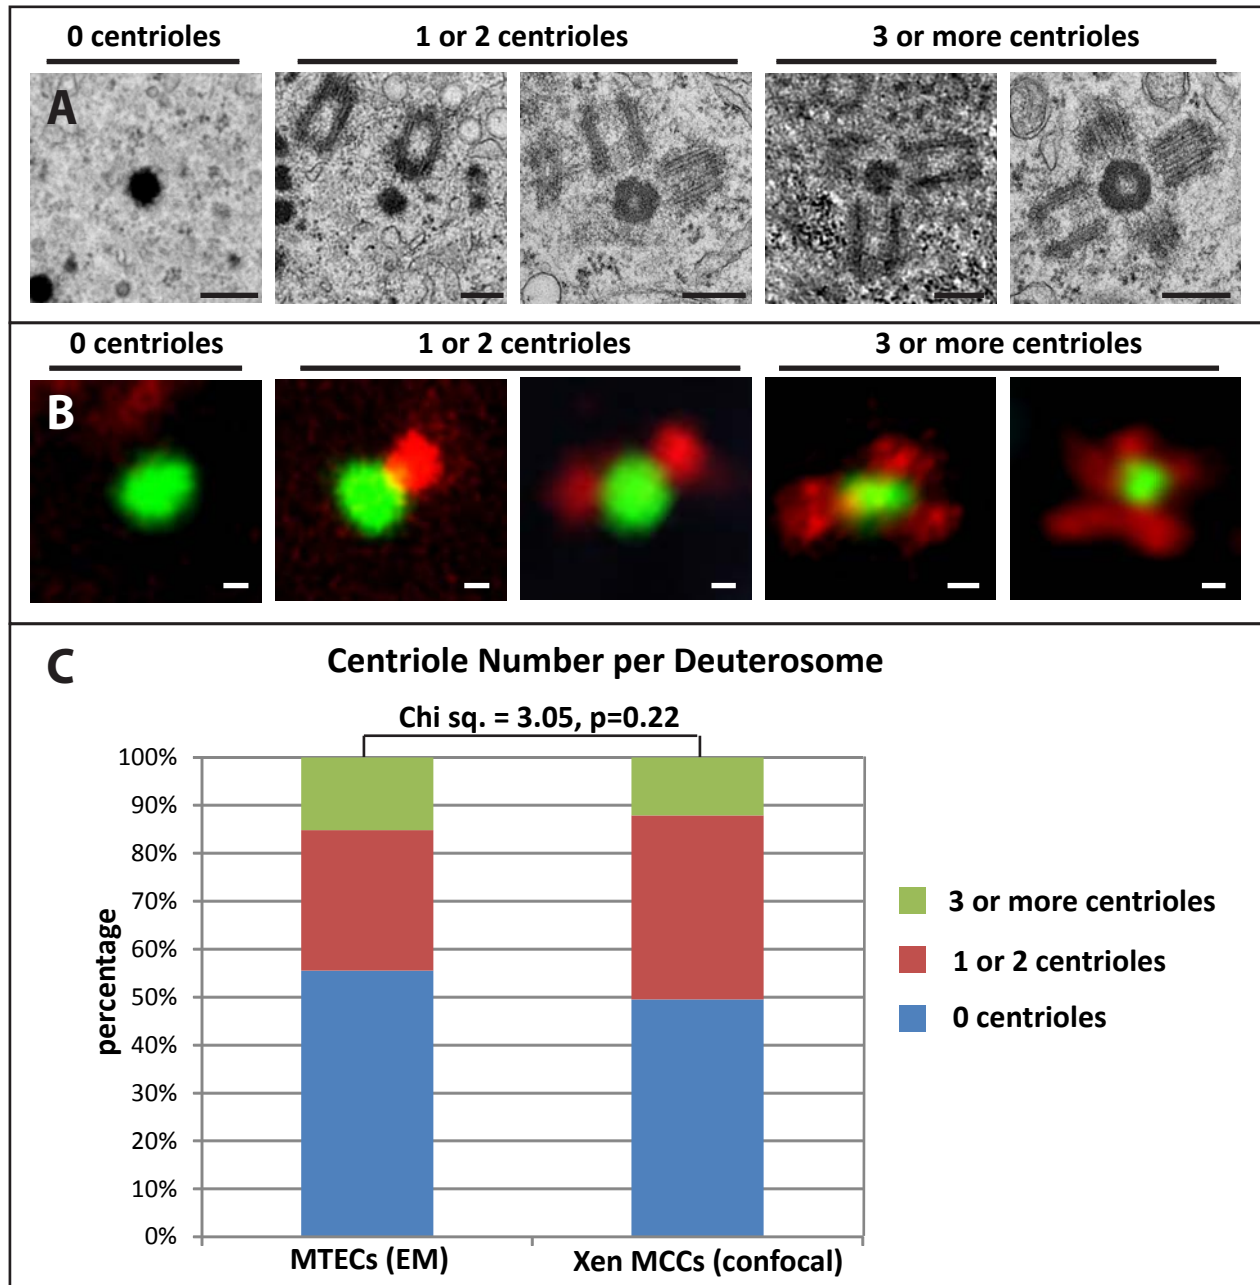

**Supplemental Figure 1. Related to Figure 1. Comparison of deuterosome mediated centriole formation by EM in MTECs and by confocal light microscopy in *Xenopus* MCCs.** (A) Series of EM images showing the range of centriole number budding off of deuterosomes (average distance from center of deuterosome to distal tip of nascent centriole is  $0.34\mu\text{m} \pm 0.08\mu\text{m}$ ,  $n=98$ )(scale bars,  $0.25\mu\text{m}$ ). (B) Series of confocal images showing the range of centriole numbers budding off of deuterosomes (average distance from centroid of deuterosome to centroid of Centrin4-RFP is  $0.49 \pm 0.12\mu\text{m}$ ,  $n=28$ )(scale bars,  $0.2\mu\text{m}$ ). (C) Quantification of centrioles budding off of deuterosomes in MTECs using EM and in *Xenopus* MCCs using GFP-xCCDC78 and Centrin-RFP, (chi square value of 3.05,  $p=0.22$ ,  $n=221$  for MTECs and  $n=136$  for *Xenopus* MCCs).

Klos-Dehring et al. Supplemental Figure 2.

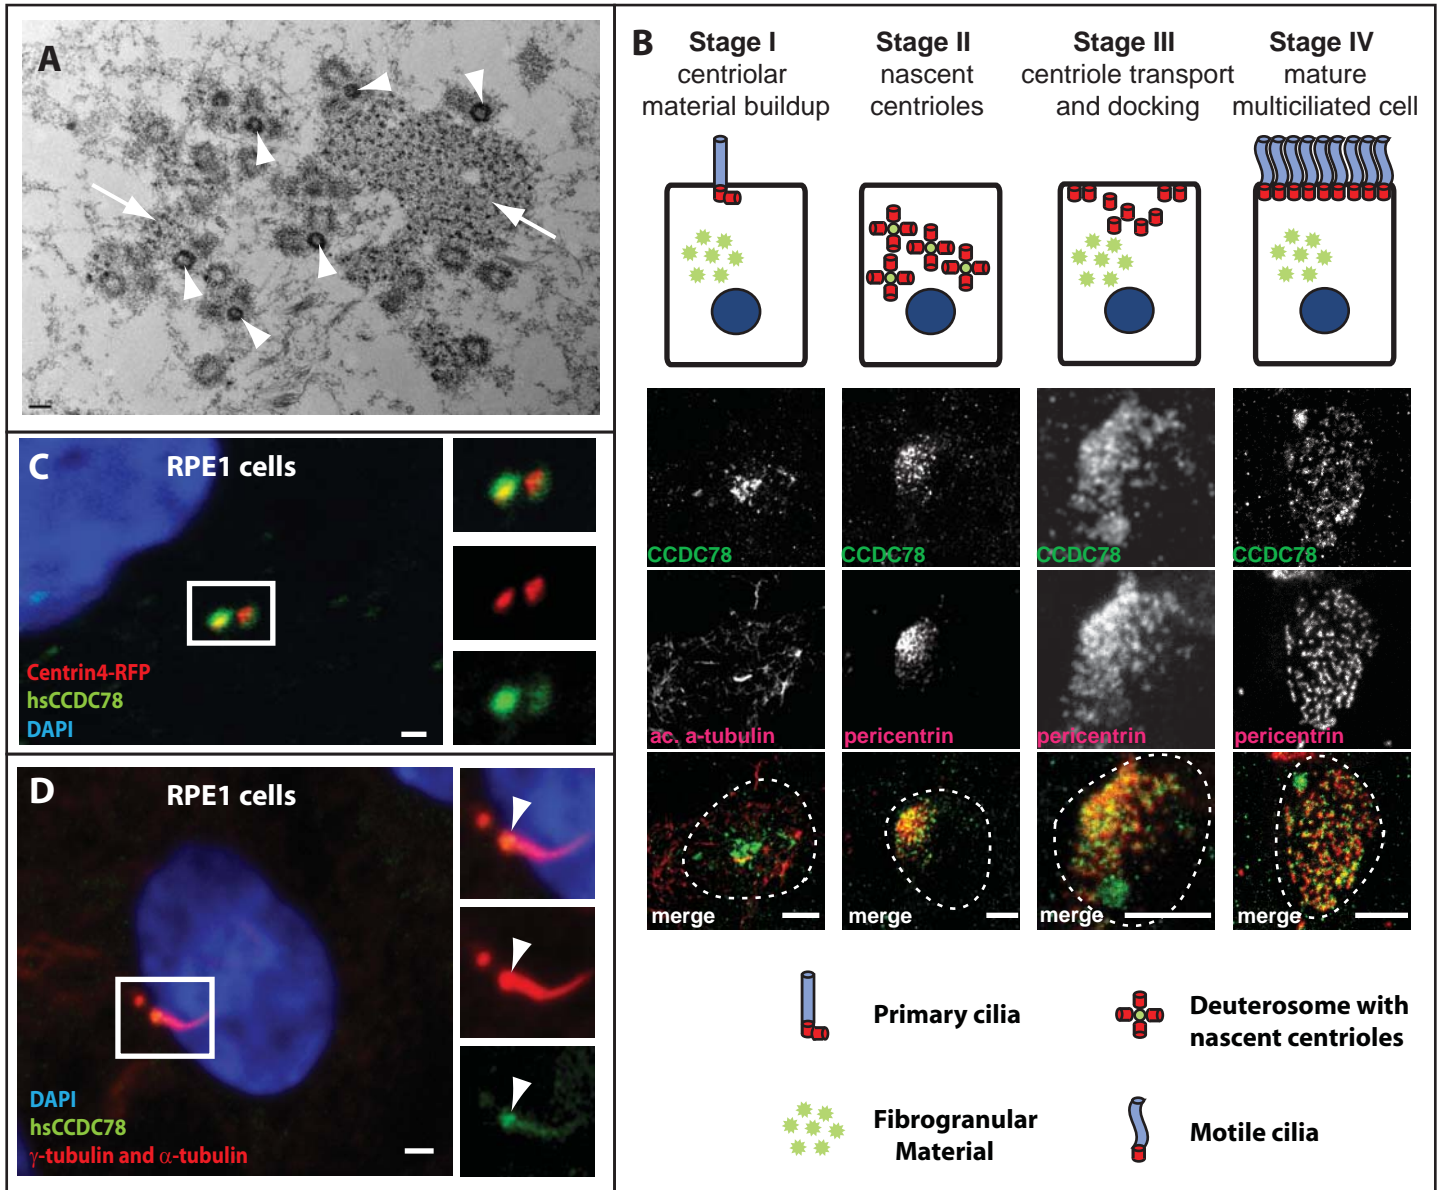

**Supplemental Figure 2. Related to Figure 1. Localization of CCDC78 in MTECs and RPEs.** (A) Fibrogranular material and deuterosomes in MTECs. Electron micrograph of MTECs undergoing centriole biogenesis, showing fibrogranular material (arrows) and deuterosomes (arrowheads) (scale bar, 0.2  $\mu$ m). (B) Localization of mCCDC78 in MTECs. A developmental time course of MCC differentiation showing antibody staining of mCCDC78 together with pericentrin (or acetylated tubulin) including a diagram of the stages of centriole biogenesis (scale bars, 5 $\mu$ m). (C-D) Co-localization of hsCCDC78 in RPE-1 cells with one of two centrioles marked with Centin4-RFP (C) and co-localizing with g-tubulin (red) enriched at the mother centriole at the base of the cilia marked with  $\alpha$ -tubulin (red)(D) (scale bar, 2 $\mu$ m).

## Klos-Dehring et al. Supplemental Figure 3

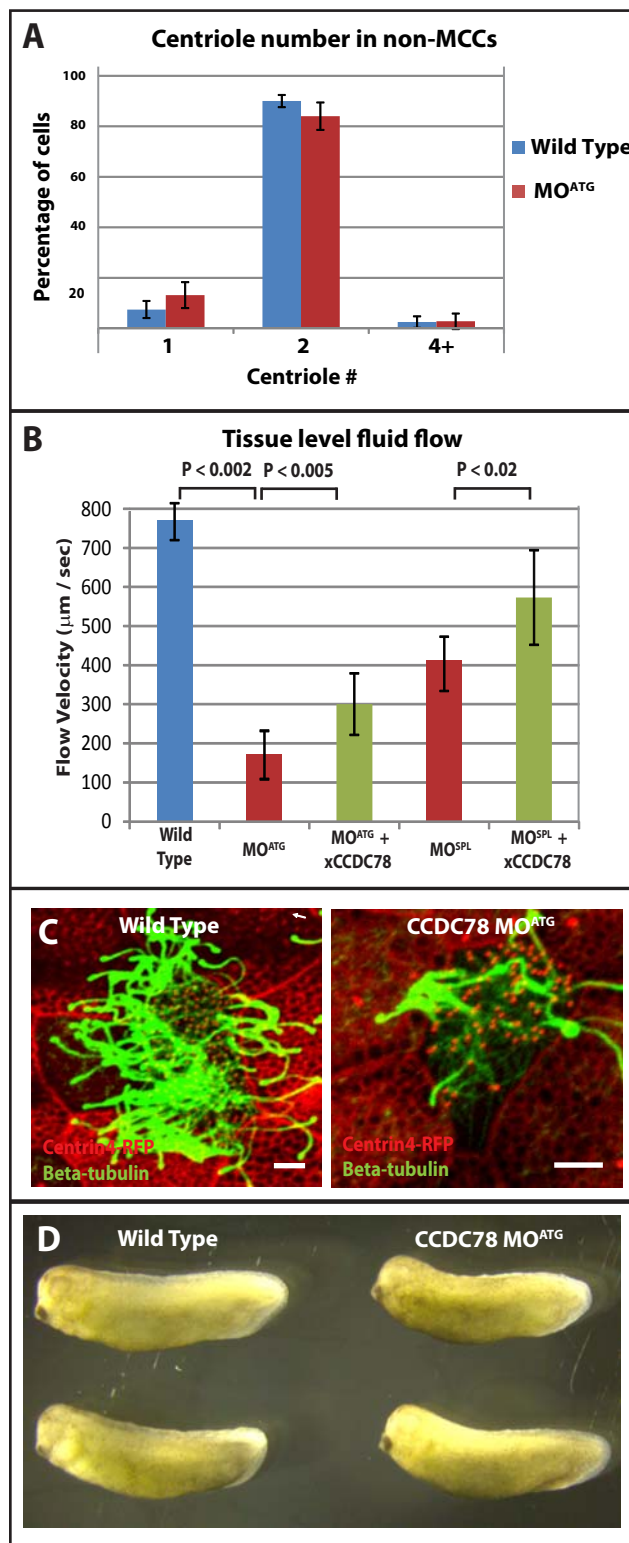

**Supplemental Figure 3. Related to Figure 2. CCDC78 morphant phenotype.** (A) Quantification of centriole number in non-MCCs showing no statistical difference between wild type and morphant tissue (chi square value of 4.56,  $p=0.10$ ,  $n=406$  cell wild type and 299 morphant cells from 3 individual embryos). (B) Quantification of fluid flow velocity in wild type ( $n=11$ ), morphant (MO<sup>ATG</sup>  $n=12$   $p<0.002$ , MO<sup>SPL</sup>  $n=11$   $p<0.002$ ) and rescued embryos (ATG rescue  $n=10$   $p<0.005$ , SPL rescue  $n=15$   $p<0.02$ ). Error bars, SD. (C) Morphant embryos have a decrease in cilia consistent with a decrease in centriole number (scale bars, 5 μm). (D) Morphant embryos exhibit no gross morphological defects.

Klos-Dehring et al. Supplemental Figure 4

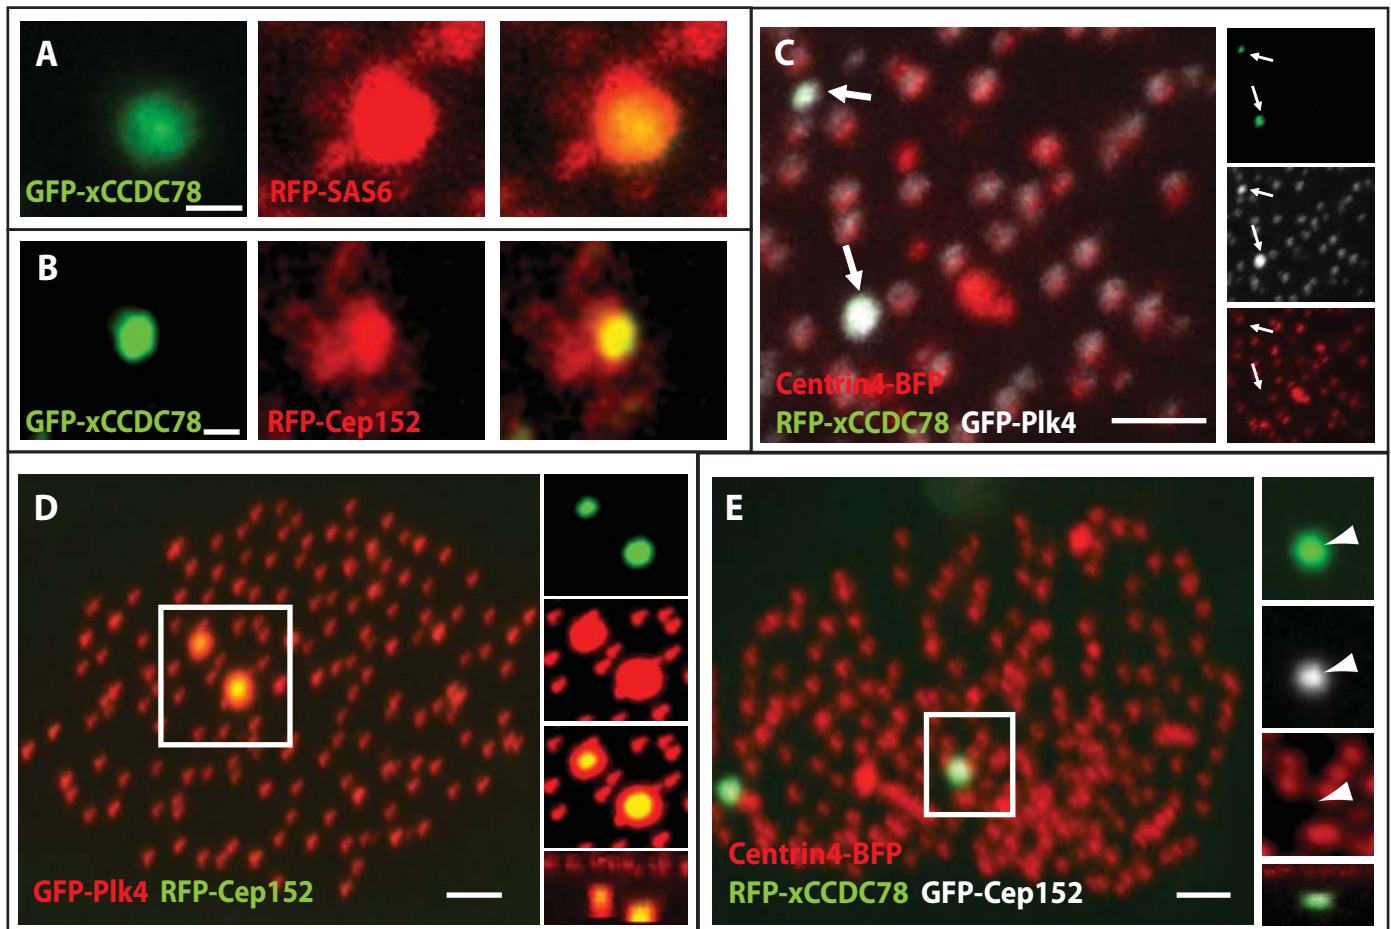

**Supplemental Figure 4. Related to Figure 3. Deuterosome localization of SAS6, Plk4 and Cep152.** (A) Localization of RFP-SAS6 to the deuterosome marked with GFP-xCCDC78 and to nascent centrioles budding off the deuterosome (scale bars 0.5 $\mu$ m). (B) Localization of RFP-Cep152 to the deuterosome marked with GFP-xCCDC78 and to nascent centrioles budding off the deuterosome (scale bars 0.5 $\mu$ m). (C) Co-localization of GFP-Plk4 with both Centrin4-BFP and RFP-xCCDC78. (D) Co-localization of GFP-Plk4 with RFP-Cep152. (E) Co-localization of RFP-Cep152 with GFP-xCCDC78 but not Centrin4-BFP (pseudo-colored for consistency) (scale bar, 2 $\mu$ m).

## Supplemental Methods

### Plasmids and Morpholinos

CCDC78 was amplified by PCR from *Xenopus* cDNA using the primers 5'-GCGGATCCATGGATTCTACAGAAGATCG-3' and 5'-CGCTCGAGACATCTCATGGCTGTTTC-3' and cloned into pCS2+ using BamHI and XhoI and was N-terminally fused to GFP or RFP. Cep152 (Unigene Xl.13956) was amplified from an Open Biosystems clone using primers 5'-CCATCGATGTTCTATCGACTTTGATAGTGGAGCACTGCAGACT-3' and 5'-CCATCGATTTAGTTGAAGTTATTTAAGTTGGGAAATGGGCT6GTC-3' and cloned into pCS2+ using ClaI and N-terminally fused to RFP. Sas6 (Unigene Xl.33005) was amplified from *Xenopus* cDNA using primers 5'-GCGAATTCATGGCCGACGAGTTGTTC-3' and 5'-GCCTCGAGGGAAGCAGGAAGCCTGG-3' and cloned into pCS2+ using EcoRI and XhoI and was N-terminally fused to RFP. Plk4 (Unigene Xl.56605) was amplified by PCR from *Xenopus* cDNA using the primers 5'-GCGAATTCATGGGGGGCAGCATAGG-3' and 5'-GCTCTAGAGCGACTGGACGAGCTGG-3' and cloned into pCS2+ using EcoRI and XbaI and N-terminally tagged with GFP. To allow for injection of DNA of this construct the CMV promoter was switched with the  $\alpha$ -tubulin promoter. GFP-xCCDC78<sup>1-210</sup> and GFP-xCCDC78<sup>205-559</sup> were made by amplifying the fragments from the GFP-xCCDC78 clone using primers: 5'-GCCTCGAGATGGATTCTACAGAAGAT-3', 5'-GGGGTACCTGGCTTGATGTTGCG-3', 5'-GGGGTACCGCCCGCAACATCAAG-3', and 5'-CGCTCGAGACATCTCATGGCTGTTTC-3'. The fragments were blunted and ligated into pCS2+ and N-terminally tagged with GFP. GFP-hCCDC78 (Unigene Hs.381943) was amplified from a clone using primers 5'-GCGAATTCATGGAGCACGCAGCCAC-3' and 5'-GCCTCGAGGGATTTCTGTGCTTGTTACC-3' cloned into pCS2+ using EcoRI and XhoI and N-terminally tagged with GFP or RFP. For mammalian

cell transfections, RFP-CCDC78 was cut out with HindIII and XbaI and ligated into EGFP-N1 that was also digested with HindIII and XbaI to remove the GFP. All cloning was verified by sequencing.

Morpholino antisense oligonucleotides (GeneTools) were injected into two- or four-cell stage embryos to inhibit the expression of *Xenopus CCDC78* (Unigene Xl.4890) (Nasevicius and Ekker, 2000). One morpholino was used to target *CCDC78* at the initiation site or a splice site: Initiation Site: 5'-CATCAGTGTTACTAGGATAGGCAGG-3'; Splice Site: 5'-TTATATCCTTACTCCTACCTTTAGT-3'; Control: 5'-CCTCTTACCTCAGTTACAATTTATA-3'. Morpholinos were injected into each quadrant of the animal pole at the two- or four-cell stage using a total of 50-75ng per embryo.

### Antibodies

| Antibody                                    | Dilution | Company           |
|---------------------------------------------|----------|-------------------|
| Rabbit anti- $\gamma$ -tubulin(T6557)       | 1:300    | Sigma-Aldrich     |
| Beta-tubulin (E7)                           | 1:500    | DSHB              |
| Rabbit anti-ZO1                             | 1:100    | Invitrogen        |
| CCDC78 (AV53233)                            |          | Sigma-Aldrich     |
| CCDC78 (HPA041186)                          |          | Sigma-Aldrich     |
| Acetylated $\alpha$ -tubulin(ab24610)*      |          | Abcam             |
| Pericentrin (611814)                        |          | BD Biosciences    |
| Cy-5-conjugated secondary antibodies        | 1:750    | Jackson Immuno    |
| Alexa fluor conjugated secondary antibodies |          | Life Technologies |

\* (Chu and Klymkowsky, 1989)

**Supplemental References:**

Chu, D.T., and Klymkowsky, M.W. (1989). The appearance of acetylated alpha-tubulin during early development and cellular differentiation in *Xenopus*. *Dev Biol* 136, 104-117.

Nasevicius, A., and Ekker, S.C. (2000). Effective targeted gene 'knockdown' in zebrafish. *Nat Genet* 26, 216-220.
